# Supplementary material for: Gallic acid diminishes pro-inflammatory interferon-γ- and interleukin-17-producing sub-populations in vitro in patients with psoriasis
Source: Springer Nature journal article supplement (doi:10.1007/s12026-023-09361-9), 2023-02-09
Supplement: MOESM1 [file 24010844]

Online Resource1 List of monoclonal antibodies used in flow cytometry

| Antibody              | Fluorochrome | Source    | Clone  |
|-----------------------|--------------|-----------|--------|
| Mouse anti-human CD3  | FICT         | BioLegend | UCHT1  |
| Mouse anti-human CD56 | PE           | BioLegend | HCD56  |
| IL-17A                | PerCP        | BioLegend | BL168  |
| Mouse anti-human CD4  | Pe-Cy7       | BioLegend | RPA-T4 |
| IFN- $\gamma$         | APC-Cyanine7 | BioLegend | 4S.B3  |

IL-17A: interleukin-17A, IFN- $\gamma$ : interferon- $\gamma$
