# Supplementary material for: Gallic acid diminishes pro-inflammatory interferon-γ- and interleukin-17-producing sub-populations in vitro in patients with psoriasis
Source: Springer Nature journal article supplement (doi:10.1007/s12026-023-09361-9), 2023-02-09
Supplement: MOESM2 [file 24010844]

Online Resource 2 Characterization of cell sub-populations by staining markers

| Phenotype                                                    | Cell population |
|--------------------------------------------------------------|-----------------|
| CD3 <sup>+</sup>                                             | T cells         |
| CD3 <sup>+</sup> CD4 <sup>+</sup>                            | Th cells        |
| CD3 <sup>+</sup> CD4 <sup>-</sup>                            | Tc cells        |
| CD3 <sup>+</sup> CD4 <sup>+</sup> IL-17A <sup>+</sup>        | Th17 cells      |
| CD3 <sup>+</sup> CD4 <sup>+</sup> IFN- $\gamma$ <sup>+</sup> | Th1 cells       |
| CD3 <sup>+</sup> CD4 <sup>-</sup> IL-17A <sup>+</sup>        | Tc17 cells      |
| CD3 <sup>+</sup> CD4 <sup>-</sup> IFN- $\gamma$ <sup>+</sup> | Tc1 cells       |
| CD3 <sup>-</sup> CD56 <sup>+</sup>                           | NK cells        |
| CD3 <sup>+</sup> CD56 <sup>+</sup>                           | NKT cells       |

Th: T helper; Tc: T cytotoxic; NK: Natural killer; NKT: Natural killer T
